# Supplementary material for: Wide-angle lasing from photonic crystal nanostructures of a liquid-crystalline blue phase
Source: Royal Society of Chemistry journal article supplement (doi:10.1039/c9tc01350d), 2019-01-01
Supplement: c9tc01350d1.pdf [file c9tc01350d1.pdf]

## Supporting Information

Wide-angle lasing from photonic crystal nanostructures of liquid-crystalline blue  
phase

*Guan-Yu Zhuo,<sup>1,2</sup> Shu-Wei Huang,<sup>3</sup> and Shih-Hung Lin<sup>4,5,\*</sup>*

<sup>1</sup>Institute of New Drug Development, China Medical University, No.91, Hsueh-Shih Rd., Taichung, 40402, Taiwan R.O.C.

<sup>2</sup>Integrative Stem Cell Center, China Medical University Hospital, No. 2, Yude Rd., Taichung 40447, Taiwan R.O.C.

<sup>3</sup>Department of Physics, National Sun Yat-sen University, No. 70, Lienhai Rd., Kaohsiung 80424, Taiwan R.O.C.

<sup>4</sup>Department of optometry, Chung Shan Medical University, No. 110, Sec. 1, Jianguo N. Rd., Taichung 40201, Taiwan R.O.C.

<sup>5</sup>Department of Ophthalmology, Chung Shan Medical University Hospital, No. 110, Sec. 1, Jianguo N. Rd., Taichung 40201, Taiwan R.O.C.

\*E-mail: shihhung@csmu.edu.tw

### **Calculation of specific mass concentration of chiral molecules in the three chiral mixtures, ZTO-5024LA-SB11, ZTO-5059LA-SB11 and HTW114200-100-SB11**

Based on the Bragg condition and the relationship of HCP on helical pitch, the required weight percentage of chiral molecules in the three chiral mixtures can be calculated, which is described as below. The criterion of Bragg reflection is expressed as Equation S1.

$$2n_{av}d \cos \theta = \lambda \quad (S1)$$

, where

$$n_{av} = \text{average refractive index of liquid crystal} = \frac{2n_o + n_e}{3}$$

$n_o$  = ordinary refractive index

$n_e$  = extraordinary refractive index

$$d = \text{reciprocal lattice spacing} = \frac{a}{\sqrt{(h^2 + k^2 + l^2)}}$$

$a$  = lattice constant

$h, k, l$  = reciprocal lattice plane

$\theta$  = reflected (diffracted) angle

$$\lambda = \text{wavelength} = \frac{2n_{av} a \cos \theta}{\sqrt{(h^2 + k^2 + l^2)}} \quad (\text{for BPI, } a = P; \text{ for BPII, } a = P/2)$$

$P$  = helical pitch

$$\text{HCP} (\mu\text{m}^{-1}) = \text{helical twisting power} = \frac{1}{PC}$$

$C$  (wt%) = weight percentage of chiral molecules

Because S811 exerts the HTP on the three NLCs are  $13.11 \mu\text{m}^{-1}$ ,  $8.95 \mu\text{m}^{-1}$ , and  $11.4 \mu\text{m}^{-1}$  respectively, the corresponding weight percentages of chiral molecules are calculated to be 26.2, 31.3, and 37 based on the above equations.

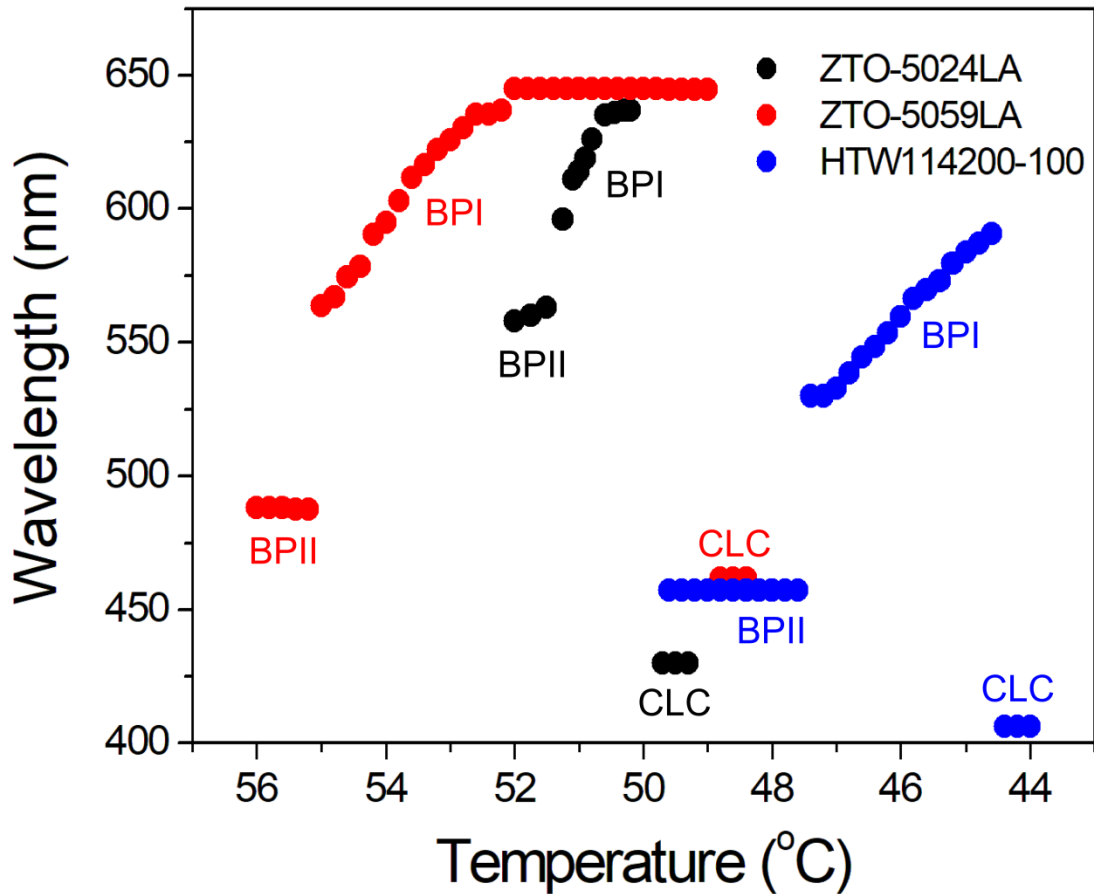

Figure S1. The phase evolution process of ZTO-5024LA+S811, ZTO-5059LA+S811 and HTW114200-100+S811 corresponds to the temperature of sample and Bragg reflection peak wavelength. In these cases, the phase starts at BPII (51.8 °C, 56.0 °C and 49.6 °C) with reflection peak wavelength at 560 nm, 488 nm and 457 nm, and then experiences BPII-BPI phase transition, where a sudden rise in reflection peak wavelength takes place. When the sample continues to drop in temperature, it accompanies with red shift in reflection peak wavelength. With the same manner, the reflection peak wavelength from BPI keeps ascending toward a maximum value (634 nm/50.2 °C, 645 nm/49.0 °C and 591 nm/44.6 °C) for the decrease in temperature and ends up until the phase transforms to CLC (49.7 °C, 48.8 °C and 44.4 °C) with the reflection peak wavelength at 432 nm, 462nm, and 406 nm, respectively.

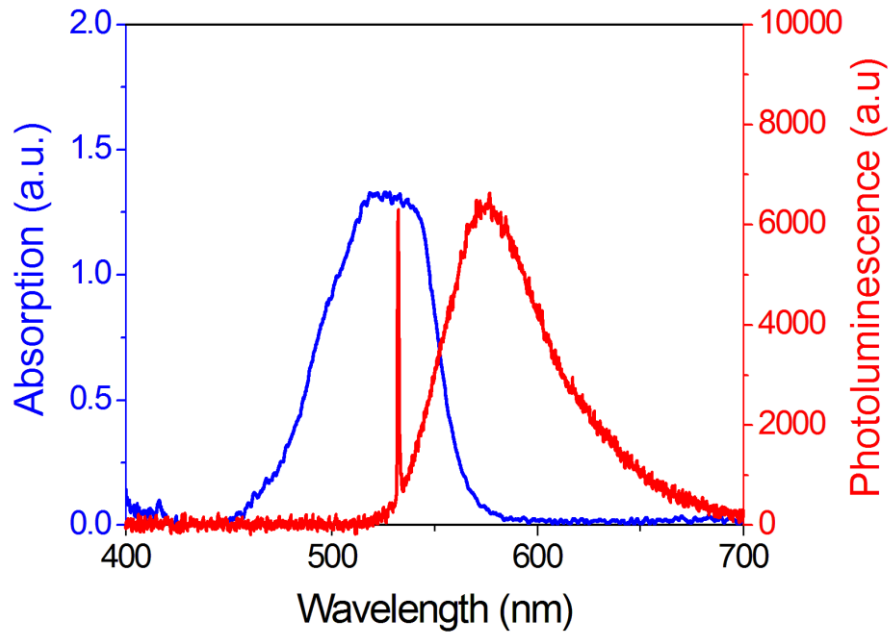

Figure S2. (a) The absorption and emission spectrum of PYRROMETH-597. The absorption band (blue line) ranges from 470 nm to 560 nm, while the emission band (red line) ranges from 530 nm to 650 nm, which overlaps with the PBG edge in the BP sample.
